# Supplementary material
Source: PubMed Central journal article supplement (PMC8011449)
Supplement: rycan200101suppa1.pdf [file rycan200101suppa1.pdf]

## **Appendix E1. Details on Participant Withdrawal Prior to Cryoablation**

The following are reasons for withdrawal before cryoablation was attempted ( $n = 9$ ): screen failures ( $n = 2$ , one participant was in another trial and scored worst pain in last 24 hours  $< 4$ , another participant scored worst pain in last 24 hours  $< 4$ ); participant was hospitalized and Karnofsky Performance Status decreased below permitted level ( $n = 1$ ); participant died ( $n = 1$ ); participant changed her mind before procedure ( $n = 1$ ); participant received radiation treatment to the index lesion ( $n = 1$ ); oncologist canceled cryoablation ( $n = 1$ ); main source of pain L2 vertebra fracture requiring radiofrequency ablation ( $n = 1$ ); and participant biopsy was negative ( $n = 1$ ). Additionally, the one participant who experienced a severe adverse event was removed from the study analysis due to complications leading to inability to complete the trial follow-up period (amputation above treatment target, so follow-up not possible).
